# Supplementary material
Source: publisher site journal article supplement (https://www.dovepress.com/article/280055)
Supplement: Supplementary file 1 [file get_supplementary_file.php]

**Supplementary Table S1.** Changes in sitting systolic blood pressure, sitting diastolic blood pressure and LDL cholesterol level from baseline to 8 weeks of treatment (age <65 years)

|                                           | Treatment groups   |                |                | NEBI/RSV vs. RSV              | NEBI/RSV vs. NEBI             |
|-------------------------------------------|--------------------|----------------|----------------|-------------------------------|-------------------------------|
|                                           | NEBI/RSV<br>(N=52) | RSV<br>(N=50)  | NEBI<br>(N=57) | LSmean Difference<br>(95% CI) | LSmean Difference<br>(95% CI) |
| sitSBP                                    |                    |                |                |                               |                               |
| Baseline, mmHg (SD)                       | 152.04 (9.51)      | 150.78 (8.78)  | 153.21 (10.14) |                               |                               |
| Week 8, mmHg (SD)                         | 138.98 (16.34)     | 145.49 (14.46) | 139.71 (16.07) |                               |                               |
| Change, mmHg (SD)                         | -13.06 (12.79)     | -5.29 (14.37)  | -13.51 (14.98) |                               |                               |
| LSmean of change <sup>a</sup> , mmHg (SE) | -12.95 (1.88)      | -5.41 (1.92)   |                | -7.54 (-12.88, -2.20)         |                               |
| LSmean of change <sup>b</sup> , mmHg (SE) | -13.15 (1.94)      |                | -13.42 (1.85)  |                               | 0.27 (-5.05, 5.59)            |
| sitDBP                                    |                    |                |                |                               |                               |
| Baseline, mmHg (SD)                       | 96.10 (5.81)       | 95.97 (8.01)   | 95.71 (6.08)   |                               |                               |
| Week 8, mmHg (SD)                         | 87.81 (9.09)       | 94.05 (9.57)   | 87.30 (9.07)   |                               |                               |
| Change, mmHg (SD)                         | -8.30 (7.49)       | -1.92 (7.81)   | -8.41 (7.26)   |                               |                               |
| LSmean of change <sup>a</sup> , mmHg (SE) | -8.28 (1.05)       | -1.94 (1.07)   |                | -6.35 (-9.31, -3.38)          |                               |
| LSmean of change <sup>b</sup> , mmHg (SE) | -8.28 (1.02)       |                | -8.43 (0.98)   |                               | 0.16 (-2.65, 2.96)            |
| LDL cholesterol                           |                    |                |                |                               |                               |
| Baseline, mg/dL (SD)                      | 158.40 (27.65)     | 153.38 (24.87) | 160.84 (30.11) |                               |                               |
| Week 8, mg/dL (SD)                        | 80.44 (25.03)      | 74.58 (21.46)  | 154.26 (38.98) |                               |                               |
| % Change                                  | -48.51 (18.10)     | -51.03 (13.69) | -3.54 (20.30)  |                               |                               |
| LSmean of % change <sup>a</sup> , % (SE)  | -48.21 (2.20)      | -51.35 (2.25)  |                | 3.14 (-3.12, 9.39)            |                               |
| LSmean of % change <sup>b</sup> , % (SE)  | -48.66 (2.64)      |                | -3.40 (2.53)   |                               | -45.26 (-52.51, -38.01)       |

**Notes:** LSmean<sup>a</sup>, least square mean by analysis of covariance model (NEBI/RSV vs RSV) adjusted for baseline value of blood pressure or LDL-C

LSmean<sup>b</sup>, least square mean by analysis of covariance model (NEBI/RSV vs NEBI) adjusted for baseline value of blood pressure or LDL-C

**Abbreviations:** NEB/RSV, nebivolol 5 mg/rosuvastatin 20 mg treatment; RSV, rosuvastatin 20 mg alone treatment; NEB, nebivolol 5 mg alone treatment; sitSBP: sitting systolic blood pressure; sitDBP: sitting diastolic blood pressure; LDL, low density lipoprotein; LSmean, least square mean; SE, standard error; SD: standard deviation

**Supplementary Table S2.** Changes in sitting systolic blood pressure, sitting diastolic blood pressure and LDL cholesterol level from baseline to 8 weeks of treatment (age  $\geq 65$  years)

|                                           | Treatment groups   |                |                | NEBI/RSV vs. RSV              | NEBI/RSV vs. NEBI             |
|-------------------------------------------|--------------------|----------------|----------------|-------------------------------|-------------------------------|
|                                           | NEBI/RSV<br>(N=40) | RSV<br>(N=41)  | NEBI<br>(N=36) | LSmean Difference<br>(95% CI) | LSmean Difference<br>(95% CI) |
| sitSBP                                    |                    |                |                |                               |                               |
| Baseline, mmHg (SD)                       | 154.67 (11.15)     | 154.04 (10.09) | 155.09 (8.86)  |                               |                               |
| Week 8, mmHg (SD)                         | 143.30 (15.57)     | 146.63 (16.77) | 139.49 (16.79) |                               |                               |
| Change, mmHg (SD)                         | -11.37 (13.54)     | -7.41 (14.58)  | -15.60 (15.49) |                               |                               |
| LSmean of change <sup>a</sup> , mmHg (SE) | -11.30 (2.21)      | -7.48 (2.18)   |                | -3.83 (-10.01, 2.36)          |                               |
| LSmean of change <sup>b</sup> , mmHg (SE) | -11.42 (2.27)      |                | -15.54 (2.39)  |                               | 4.12 (-2.46, 10.70)           |
| sitDBP                                    |                    |                |                |                               |                               |
| Baseline, mmHg (SD)                       | 89.51 (10.11)      | 90.07 (8.71)   | 89.73 (8.44)   |                               |                               |
| Week 8, mmHg (SD)                         | 81.46 (8.46)       | 87.49 (11.41)  | 80.63 (10.01)  |                               |                               |
| Change, mmHg (SD)                         | -8.05 (7.61)       | -2.58 (7.28)   | -9.10 (9.03)   |                               |                               |
| LSmean of change <sup>a</sup> , mmHg (SE) | -8.12 (1.13)       | -2.51 (1.11)   |                | -5.61 (-8.76, -2.45)          |                               |
| LSmean of change <sup>b</sup> , mmHg (SE) | -8.09 (1.18)       |                | -9.05 (1.24)   |                               | 0.96 (-2.44, 4.36)            |
| LDL cholesterol                           |                    |                |                |                               |                               |
| Baseline, mg/dL (SD)                      | 154.10 (22.29)     | 151.56 (30.58) | 151.78 (29.91) |                               |                               |
| Week 8, mg/dL (SD)                        | 79.48 (22.42)      | 78.88 (34.93)  | 156.28 (33.30) |                               |                               |
| % Change                                  | -48.56 (12.18)     | -48.53 (17.32) | 3.42 (14.27)   |                               |                               |
| LSmean of % change <sup>a</sup> , % (SE)  | -48.66 (2.37)      | -48.43 (2.34)  |                | -0.23 (-6.85, 6.40)           |                               |
| LSmean of % change <sup>b</sup> , % (SE)  | -48.52 (2.10)      |                | 3.38 (2.21)    |                               | -51.90 (-57.99, -45.82)       |

**Notes:** LSmean<sup>a</sup>, least square mean by analysis of covariance model (NEBI/RSV vs RSV) adjusted for baseline value of blood pressure or LDL-C

LSmean<sup>b</sup>, least square mean by analysis of covariance model (NEBI/RSV vs NEBI) adjusted for baseline value of blood pressure or LDL-C

**Abbreviations:** NEB/RSV, nebivolol 5 mg/rosuvastatin 20 mg treatment; RSV, rosuvastatin 20 mg alone treatment; NEB, nebivolol 5 mg alone treatment; sitSBP: sitting systolic blood pressure; sitDBP: sitting diastolic blood pressure; LDL, low density lipoprotein; LSmean, least square mean; SE, standard error; SD: standard deviation

**Supplementary Table S3.** Changes in sitting systolic blood pressure, sitting diastolic blood pressure and LDL cholesterol level from baseline to 8 weeks of treatment (men)

|                                           | Treatment groups   |                |                | NEBI/RSV vs. RSV              | NEBI/RSV vs. NEBI             |
|-------------------------------------------|--------------------|----------------|----------------|-------------------------------|-------------------------------|
|                                           | NEBI/RSV<br>(N=68) | RSV<br>(N=65)  | NEBI<br>(N=76) | LSmean Difference<br>(95% CI) | LSmean Difference<br>(95% CI) |
| sitSBP                                    |                    |                |                |                               |                               |
| Baseline, mmHg (SD)                       | 152.35 (10.28)     | 152.86 (9.88)  | 154.56 (10.37) |                               |                               |
| Week 8, mmHg (SD)                         | 141.23 (16.17)     | 147.28 (15.84) | 140.71 (16.64) |                               |                               |
| Change, mmHg (SD)                         | -11.13 (13.14)     | -5.58 (14.19)  | -13.85 (15.25) |                               |                               |
| LSmean of change <sup>a</sup> , mmHg (SE) | -11.17 (1.65)      | -5.54 (1.69)   |                | -5.62 (-10.30, -0.95)         |                               |
| LSmean of change <sup>b</sup> , mmHg (SE) | -11.35 (1.73)      |                | -13.65 (1.63)  |                               | 2.30 (-2.42, 7.01)            |
| sitDBP                                    |                    |                |                |                               |                               |
| Baseline, mmHg (SD)                       | 94.04 (8.50)       | 94.21 (8.65)   | 94.20 (7.85)   |                               |                               |
| Week 8, mmHg (SD)                         | 86.14 (9.28)       | 93.04 (10.84)  | 85.82 (9.72)   |                               |                               |
| Change, mmHg (SD)                         | -7.90 (7.85)       | -1.17 (6.61)   | -8.38 (8.05)   |                               |                               |
| LSmean of change <sup>a</sup> , mmHg (SE) | -7.91 (0.87)       | -1.16 (0.89)   |                | -6.76 (-9.21, -4.30)          |                               |
| LSmean of change <sup>b</sup> , mmHg (SE) | -7.93 (0.92)       |                | -8.36 (0.87)   |                               | 0.43 (-2.08, 2.94)            |
| LDL cholesterol                           |                    |                |                |                               |                               |
| Baseline, mg/dL (SD)                      | 151.29 (22.80)     | 148.54 (25.38) | 155.12 (28.14) |                               |                               |
| Week 8, mg/dL (SD)                        | 77.88 (24.03)      | 75.98 (30.59)  | 154.82 (35.48) |                               |                               |
| % Change                                  | -48.19 (16.72)     | -49.19 (16.17) | 0.28 (18.08)   |                               |                               |
| LSmean of % change <sup>a</sup> , % (SE)  | -48.19 (2.00)      | -49.20 (2.05)  |                | 1.01 (-4.67, 6.69)            |                               |
| LSmean of % change <sup>b</sup> , % (SE)  | -48.38 (2.11)      |                | 0.46 (1.99)    |                               | -48.84 (-54.58, -43.10)       |

**Notes:** LSmean<sup>a</sup>, least square mean by analysis of covariance model (NEBI/RSV vs RSV) adjusted for baseline value of blood pressure or LDL-C

LSmean<sup>b</sup>, least square mean by analysis of covariance model (NEBI/RSV vs NEBI) adjusted for baseline value of blood pressure or LDL-C

**Abbreviations:** NEB/RSV, nebivolol 5 mg/rosuvastatin 20 mg treatment; RSV, rosuvastatin 20 mg alone treatment; NEB, nebivolol 5 mg alone treatment; sitSBP: sitting systolic blood pressure; sitDBP: sitting diastolic blood pressure; LDL, low density lipoprotein; LSmean, least square mean; SE, standard error; SD: standard deviation

**Supplementary Table S4.** Changes in sitting systolic blood pressure, sitting diastolic blood pressure and LDL cholesterol level from baseline to 8 weeks of treatment (women)

|                                           | Treatment groups   |                |                | NEBI/RSV vs. RSV              | NEBI/RSV vs. NEBI             |
|-------------------------------------------|--------------------|----------------|----------------|-------------------------------|-------------------------------|
|                                           | NEBI/RSV<br>(N=24) | RSV<br>(N=26)  | NEBI<br>(N=17) | LSmean Difference<br>(95% CI) | LSmean Difference<br>(95% CI) |
| sitSBP                                    |                    |                |                |                               |                               |
| Baseline, mmHg (SD)                       | 155.55 (10.14)     | 150.72 (8.38)  | 151.16 (4.69)  |                               |                               |
| Week 8, mmHg (SD)                         | 139.82 (16.07)     | 142.82 (14.27) | 134.76 (13.87) |                               |                               |
| Change, mmHg (SD)                         | -15.73 (12.54)     | -7.91 (15.15)  | -16.40 (14.84) |                               |                               |
| LSmean of change <sup>a</sup> , mmHg (SE) | -14.98 (2.87)      | -8.59 (2.76)   |                | -6.39 (-14.54, 1.76)          |                               |
| LSmean of change <sup>b</sup> , mmHg (SE) | -15.44 (2.83)      |                | -16.80 (3.38)  |                               | 1.36 (-7.70, 10.42)           |
| sitDBP                                    |                    |                |                |                               |                               |
| Baseline, mmHg (SD)                       | 90.96 (8.56)       | 91.05 (8.93)   | 89.81 (5.40)   |                               |                               |
| Week 8, mmHg (SD)                         | 81.95 (8.94)       | 86.22 (9.56)   | 79.78 (9.67)   |                               |                               |
| Change, mmHg (SD)                         | -9.01 (6.52)       | -4.84 (9.11)   | -10.03 (7.55)  |                               |                               |
| LSmean of change <sup>a</sup> , mmHg (SE) | -9.03 (1.51)       | -4.82 (1.46)   |                | -4.21 (-8.43, 0.02)           |                               |
| LSmean of change <sup>b</sup> , mmHg (SE) | -8.93 (1.42)       | -10.14 (1.69)  |                |                               | 1.21 (-3.26, 5.67)            |
| LDL cholesterol                           |                    |                |                |                               |                               |
| Baseline, mg/dL (SD)                      | 171.38 (27.02)     | 162.62 (30.24) | 167.24 (37.46) |                               |                               |
| Week 8, mg/dL (SD)                        | 86.08 (22.55)      | 77.85 (21.76)  | 156.06 (42.97) |                               |                               |
| % Change                                  | -49.51 (12.74)     | -51.68 (13.35) | -5.91 (19.75)  |                               |                               |
| LSmean of % change <sup>a</sup> , % (SE)  | -49.16 (2.67)      | -52.00 (2.57)  |                | 2.83 (-4.67, 10.34)           |                               |
| LSmean of % change <sup>b</sup> , % (SE)  | -49.36 (3.26)      | -6.11 (3.88)   |                |                               | -43.25 (-53.53, -32.98)       |

**Notes:** LSmean<sup>a</sup>, least square mean by analysis of covariance model (NEBI/RSV vs RSV) adjusted for baseline value of blood pressure or LDL-C

LSmean<sup>b</sup>, least square mean by analysis of covariance model (NEBI/RSV vs NEBI) adjusted for baseline value of blood pressure or LDL-C

**Abbreviations:** NEB/RSV, nebivolol 5 mg/rosuvastatin 20 mg treatment; RSV, rosuvastatin 20 mg alone treatment; NEB, nebivolol 5 mg alone treatment; sitSBP: sitting systolic blood pressure; sitDBP: sitting diastolic blood pressure; LDL, low density lipoprotein; LSmean, least square mean; SE, standard error; SD: standard deviation

**Supplementary Table S5.** Comparison of changes in sitting systolic blood pressure, sitting diastolic blood pressure and LDL cholesterol level from baseline to 8 weeks of treatment between age < 65 years and 65 ≥ years

|                                           | NEBI/RSV       |                |                            | NEBI           |                |                            |
|-------------------------------------------|----------------|----------------|----------------------------|----------------|----------------|----------------------------|
|                                           | < 65 years     | 65 ≥ years     | LSmean Difference (95% CI) | < 65 years     | 65 ≥ years     | LSmean Difference (95% CI) |
| n                                         | 52             | 40             |                            | 57             | 36             |                            |
| <b>sitSBP</b>                             |                |                |                            |                |                |                            |
| Baseline, mmHg (SD)                       | 152.04 (9.51)  | 154.67 (11.15) |                            | 153.21 (10.14) | 155.09 (8.86)  |                            |
| Week 8, mmHg (SD)                         | 138.98 (16.34) | 143.30 (15.57) |                            | 139.71 (16.07) | 139.49 (16.79) |                            |
| Change, mmHg (SD)                         | -13.06 (12.79) | -11.37 (13.54) |                            | -13.51 (14.98) | -15.60 (15.49) |                            |
| LSmean of change <sup>a</sup> , mmHg (SE) | -13.17 (1.83)  | -11.23 (2.09)  | -1.95 (-7.49, 3.59)        | -13.73 (1.99)  | -15.25 (2.50)  | 1.52 (-4.84, 7.89)         |
| <b>sitDBP</b>                             |                |                |                            |                |                |                            |
| Baseline, mmHg (SD)                       | 96.10 (5.81)   | 89.51 (10.11)  |                            | 95.71 (6.08)   | 89.73 (8.44)   |                            |
| Week 8, mmHg (SD)                         | 87.81 (9.09)   | 81.46 (8.46)   |                            | 87.30 (9.07)   | 80.63 (10.01)  |                            |
| Change, mmHg (SD)                         | -8.30 (7.49)   | -8.05 (7.61)   |                            | -8.41 (7.26)   | -9.10 (9.03)   |                            |
| LSmean of change <sup>a</sup> , mmHg (SE) | -7.34 (1.02)   | -9.30 (1.18)   | 1.96 (-1.25, 5.17)         | -7.84 (1.07)   | -10.01 (1.37)  | 2.17 (-1.42, 5.75)         |
| <b>LDL cholesterol</b>                    |                |                |                            |                |                |                            |
| Baseline, mg/dL (SD)                      | 158.40 (27.65) | 154.10 (22.29) |                            | 160.84 (30.11) | 151.78 (29.91) |                            |
| Week 8, mg/dL (SD)                        | 80.44 (25.03)  | 79.48 (22.42)  |                            | 154.26 (38.98) | 156.28 (33.30) |                            |
| % Change                                  | -48.51 (18.10) | -48.56 (12.18) |                            | -3.54 (20.30)  | 3.42 (14.27)   |                            |
| LSmean of % change <sup>a</sup> , % (SE)  | -48.35 (2.19)  | -48.77 (2.50)  | 0.42 (-6.19, 7.02)         | -3.22 (2.41)   | 2.91 (3.04)    | -6.14 (-13.88, 1.61)       |

**Notes:** LSmean<sup>a</sup>, least square mean by analysis of covariance model adjusted for baseline value of blood pressure or LDL-C

**Abbreviations:** NEB/RSV, nebivolol 5 mg/rosuvastatin 20 mg treatment; NEB, nebivolol 5 mg alone treatment; sitSBP: sitting systolic blood pressure; sitDBP: sitting diastolic blood pressure; LDL, low density lipoprotein; LSmean, least square mean; SE, standard error; SD: standard deviation

**Supplementary Table S6.** Comparison of changes in sitting systolic blood pressure, sitting diastolic blood pressure and LDL cholesterol level from baseline to 8 weeks of treatment between men and women

|                                           | NEBI/RSV       |                |                               | NEBI           |                |                               |
|-------------------------------------------|----------------|----------------|-------------------------------|----------------|----------------|-------------------------------|
|                                           | Men            | Women          | LSmean Difference<br>(95% CI) | Men            | Women          | LSmean Difference<br>(95% CI) |
| n                                         | 68             | 24             |                               | 76             | 17             |                               |
| sitSBP                                    |                |                |                               |                |                |                               |
| Baseline, mmHg (SD)                       | 152.35 (10.28) | 155.55 (10.14) |                               | 154.56 (10.37) | 151.16 (4.69)  |                               |
| Week 8, mmHg (SD)                         | 141.23 (16.17) | 139.82 (16.07) |                               | 140.71 (16.64) | 134.76 (13.87) |                               |
| Change, mmHg (SD)                         | -11.13 (13.14) | -15.73 (12.54) |                               | -13.85 (15.25) | -16.40 (14.84) |                               |
| LSmean of change <sup>a</sup> , mmHg (SE) | -11.18 (1.59)  | -15.58 (2.68)  | 4.40 (-1.81, 10.62)           | -13.64 (1.72)  | -17.32 (3.65)  | 3.67 (-4.36, 11.70)           |
| sitDBP                                    |                |                |                               |                |                |                               |
| Baseline, mmHg (SD)                       | 94.04 (8.50)   | 90.96 (8.56)   |                               | 94.20 (7.85)   | 89.81 (5.40)   |                               |
| Week 8, mmHg (SD)                         | 86.14 (9.28)   | 81.95 (8.94)   |                               | 85.82 (9.72)   | 79.78 (9.67)   |                               |
| Change, mmHg (SD)                         | -7.90 (7.85)   | -9.01 (6.52)   |                               | -8.38 (8.05)   | -10.03 (7.55)  |                               |
| LSmean of change <sup>a</sup> , mmHg (SE) | -7.65 (0.86)   | -9.71 (1.46)   | 2.06 (-1.33, 5.45)            | -8.20 (0.90)   | -10.83 (1.94)  | 2.63 (-1.65, 6.92)            |
| LDL cholesterol                           |                |                |                               |                |                |                               |
| Baseline, mg/dL (SD)                      | 151.29 (22.80) | 171.38 (27.02) |                               | 155.12 (28.14) | 167.24 (37.46) |                               |
| Week 8, mg/dL (SD)                        | 77.88 (24.03)  | 86.08 (22.55)  |                               | 154.82 (35.48) | 156.06 (42.97) |                               |
| % Change                                  | -48.19 (16.72) | -49.51 (12.74) |                               | 0.28 (18.08)   | -5.91 (19.75)  |                               |
| LSmean of % change <sup>a</sup> , % (SE)  | -48.65 (1.94)  | -48.20 (3.38)  | -0.44 (-8.37, 7.49)           | 0.07 (2.10)    | -4.96 (4.47)   | 5.03 (-4.82, 14.88)           |

**Notes:** LSmean<sup>a</sup>, least square mean by analysis of covariance model adjusted for baseline value of blood pressure or LDL-C

**Abbreviations:** NEB/RSV, nebivolol 5 mg/rosuvastatin 20 mg treatment; NEB, nebivolol 5 mg alone treatment; sitSBP: sitting systolic blood pressure; sitDBP: sitting diastolic blood pressure; LDL, low density lipoprotein; LSmean, least square mean; SE, standard error; SD: standard deviation

**Table S7: Study centers and IRB approval numbers**

|    | Center                                                       | IRB approval number  | IRB approval date |
|----|--------------------------------------------------------------|----------------------|-------------------|
| 1  | Seoul National University Bundang Hospital                   | B-1606/349-003       | 2016.07.11        |
| 2  | Asan Medical Center                                          | 2016-1010            | 2016.09.12        |
| 3  | Chonnam National University Hospital                         | CNUH-2016-205        | 2016.08.17        |
| 4  | Korea University Anam Hospital                               | ED16109              | 2016.06.20        |
| 5  | Keimyung University Dongsan Medical Center                   | DSMC 2016-05-017     | 2016.08.12        |
| 6  | Dong-A University Hospital                                   | DAUHIRB-16-089       | 2016.05.25        |
| 7  | Dongguk University Ilsan Hospital                            | 2016-55              | 2016.06.09        |
| 8  | Catholic University of Korea Seoul St. Mary's Hospital       | KC16MDMT0468         | 2016.07.13        |
| 9  | National Health Insurance Service Ilsan Hospital             | NHIMC 2016-05-005    | 2016.08.23        |
| 10 | Hanyang University Hospital                                  | HYUH 2016-05-013     | 2016.08.24        |
| 11 | Seoul Medical Center                                         | 2016-099             | 2016.11.30.       |
| 12 | Kangwon National University Hospital                         | KNUH-2016-10-003     | 2016.11.08        |
| 13 | Ajou University Medical Center                               | AJIRB-MED-CT3-16-382 | 2016.12.02        |
| 14 | CHA Bundang Medical Center                                   | CHAMC 2016-11-012    | 2016.12.23.       |
| 15 | Pusan National University Hospital                           | H-1611-002-061       | 2016.11.22        |
| 16 | Gachon University Gil Medical Center                         | GCIRB2017-066        | 2017.02.16        |
| 17 | Seoul National University Hospital                           | H-1702-032-829       | 2017.02.15        |
| 18 | Kangdong Sacred Heart Hospital                               | KANGDONG 2017-02-001 | 2017.03.22        |
| 19 | Korea University Ansan Hospital                              | 2017AS0145           | 2017.02.28        |
| 20 | Chungnam National University Hospital                        | CNUH 2017-02-030     | 2017.03.02        |
| 21 | The Catholic University of Korea St. Paul's Hospital         | PC17MDDT0058         | 2017.09.21        |
| 22 | Kyung Hee University Hospital                                | CHUH 2019-09-032     | 2017.12.27        |
| 23 | The Catholic University of Korea Daejeon St. Mary's Hospital | DC17MDDT0074         | 2017.09.25        |
| 24 | The Catholic University of Korea St. Vincent's Hospital      | VC17MDDT0177         | 2017.10.31        |
| 25 | Bundang Jesaeng Hospital                                     | IMC17-04             | 2017.10.10        |
| 27 | Daegu Catholic University Medical Center                     | CR-17-114-L          | 2017.11.08        |
| 28 | Gangnam Severance Hospital                                   | 3-2017-0281          | 2017.11.29        |
